# Supplementary material for: FBXW7 mediates high glucose-induced SREBP-1 expression in renal tubular cells of diabetic nephropathy under PI3K/Akt pathway regulation
Source: PubMed Central journal article supplement — Mol Med Rep. 2021 Jan 26;23(4):233. doi: 10.3892/mmr.2021.11872 (PMC7893693; doi:10.3892/mmr.2021.11872), 2021-01-26

Figure S1. Immunofluorescence double staining of the expression levels of FBXW7 and nestin in the kidney of normal mice and diabetic mice. Scale bar, 20  $\mu$ m. White arrows indicate the co-expression of FBXW7 and nestin. FBXW7, F-box and WD repeat domain containing 7.

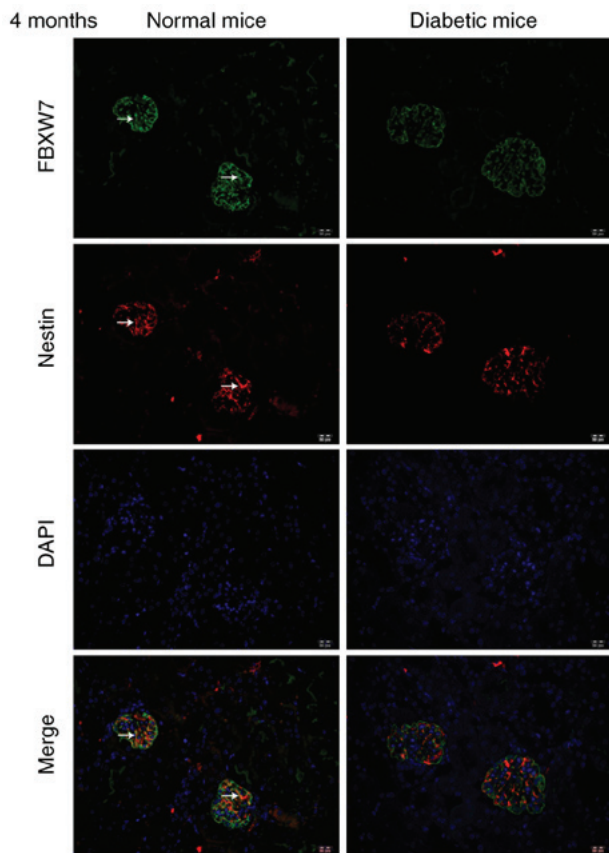

Supplement: Supplementary_Data.pdf [file Supplementary_Data.pdf]
